# Supplementary material for: Ionic conductivity and disorder in calcium and barium nitrogen hydrogen phases
Source: Royal Society of Chemistry journal article supplement (doi:10.1039/d2fd00178k), 2023-01-01
Supplement: d2fd00178k1.pdf [file d2fd00178k1.pdf]

SUPPLEMENTAL INFORMATION:

Ionic conductivity and disorder in calcium and barium nitrogen hydrogen phases

Gavin J. Irvine\* and John TS Irvine\*

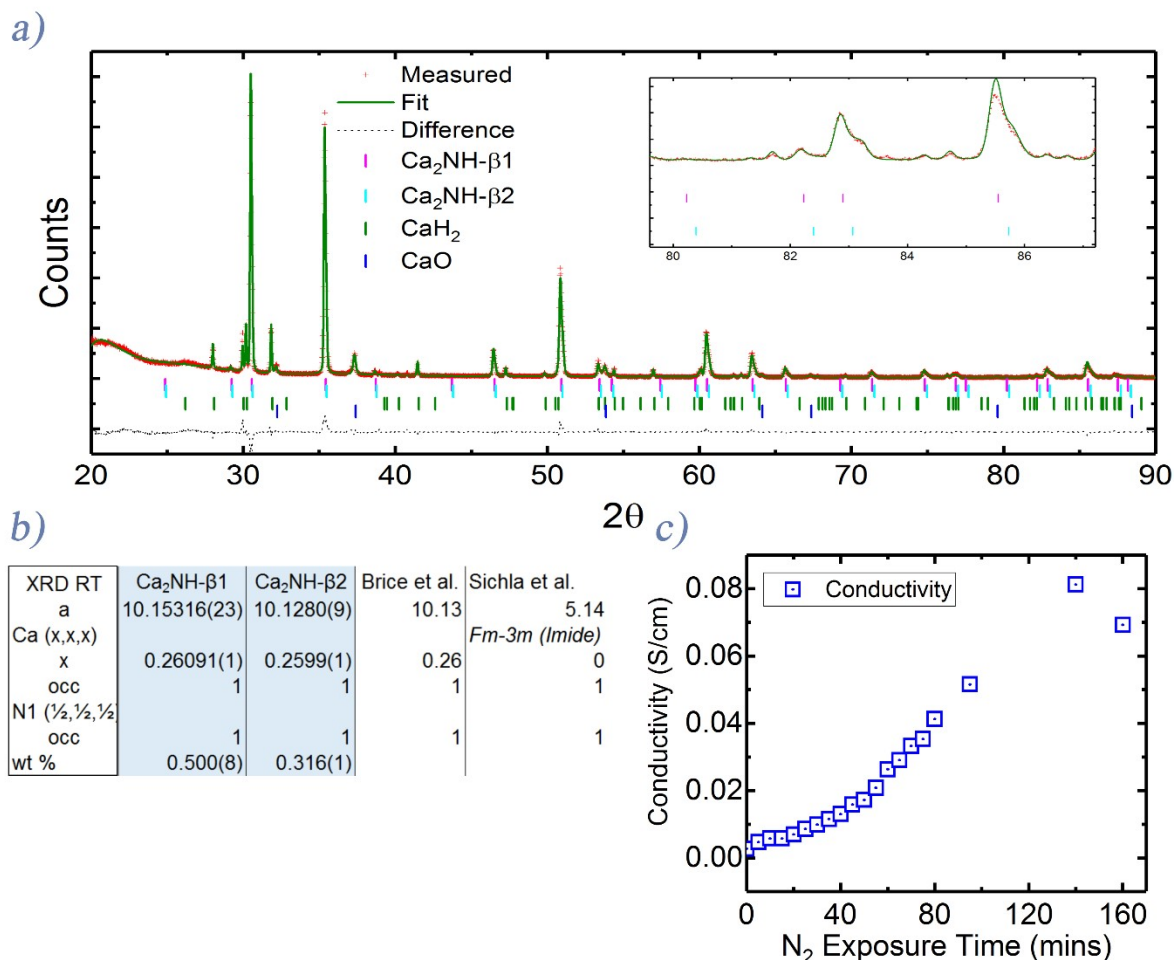

Figure S1: CaH<sub>2</sub>+N<sub>2</sub> at 600 °C PXRD pattern refinement and EIS data as a function of exposure time. In contrast to Ca<sub>2</sub>NH formed from Ca<sub>2</sub>N, the ionic conductivity ( $\sigma$ ) starts off small ( $4 \times 10^{-3}$  S/cm) before slowly climbing to maximum value of 0.08 S/cm. We can see that further exposure time past approximately 150 mins actually causes  $\sigma$  to drop by about 12.5%. This drop is associated with the presence of shoulder peaks in the post experiment PXRD pattern. Reference patterns are from Brice et al and Sichla et al [1], [2].

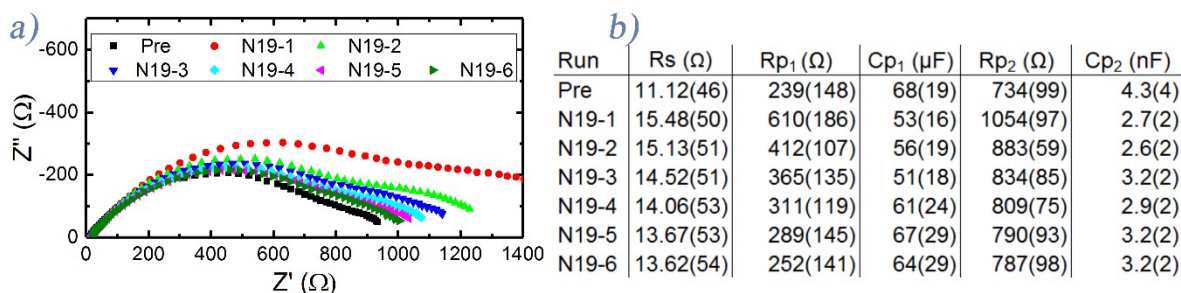

Figure S2: Nyquist data from the  $\text{CaH}_2+\text{N}_2$  experiment for the 19<sup>th</sup> dose of nitrogen (N19). The number after the dash represents the order in which the scans were collected. They were collected in 5 min increments. The data show that exposure to  $\text{N}_2$  is associated with a dramatic increase in the charge transfer process (electrode,  $\mu F$ , and surface,  $nF$ ) [3], while the bulk conductivity ( $R_s$ ) originally decreases, before recovering albeit not entirely. This decrease in bulk performance is associated with shoulder peak formation.

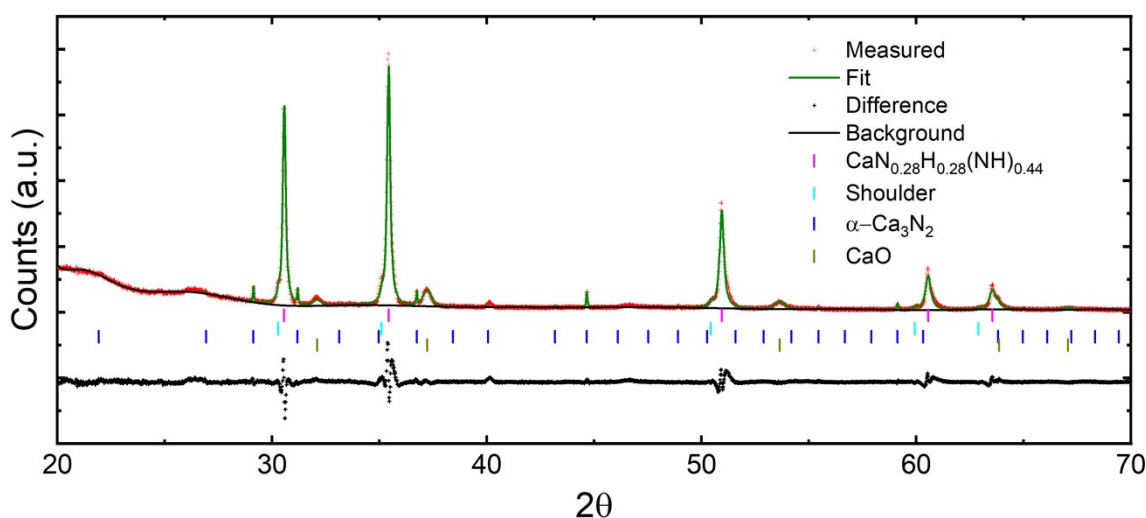

Figure S3: XRD Pattern and refinement of an  $\alpha\text{-Ca}_2\text{NH}$  phase formed by exposing an  $\alpha\text{-Ca}_3\text{N}_2$  pellet to  $5/5/90 \text{ cm}^3/\text{min}$   $\text{N}_2/\text{H}_2/\text{Ar}$  at  $600^\circ\text{C}$ . The pattern shows the characteristic shoulder peaks of a secondary species for a  $\text{Ca}_2\text{NH}$  phase. Additionally, the refinement showed that the optimum Ca:N ratio was 2:1.44, which gives an imide concentration of 44%, which is higher than found in a neutron diffraction experiment [4]. This result implies that difference in synthesis conditions gives rise to different amounts of secondary species. However, since H-species, are all but invisible in XRD, the result is far from certain and warrants further exploration.

| Phase                       | Nitride-hydrate phase | Shoulder    |
|-----------------------------|-----------------------|-------------|
| <b>Space Group</b>          | Fm-3m                 | Fm-3m       |
| <b>a (Å)</b>                | 5.07200(25)           | 5.1191(6)   |
| <b>V (Å<sup>3</sup>)</b>    | 130.475(11)           | 134.150(26) |
| <b>Ca (0 0 0)</b>           |                       |             |
| <b>Uiso (Å<sup>2</sup>)</b> | 1.94(11)              | 0           |
| <b>N (½ ½ ½)</b>            |                       |             |
| <b>frac</b>                 | 0.722                 | 1           |
| <b>Uiso</b>                 | 0                     | 0           |
| <b>χ<sup>2</sup></b>        | 4.82                  |             |
| <b>Rp</b>                   | 0.0830                |             |
| <b>Rwp</b>                  | 0.115                 |             |

Table S1: Refinement results for figure S3. CaO and  $\alpha$ -Ca<sub>3</sub>N<sub>2</sub> refinement results gave lattice parameters of 4.834 Å and 11.484608 Å respectively, while the other parameters remained those of the published literature[5], [6].

#### References:

- [1] J. F. Brice, J. P. Motte, A. Courtois, J. Protas, and J. Aubry, "Etude structurale de Ca<sub>2</sub>NH par diffraction des rayons X, diffraction des neutrons et resonance magnetique nucléaire du proton dans le solide," *J. Solid State Chem.*, vol. 17, no. 1–2, pp. 135–142, 1976, doi: 10.1016/0022-4596(76)90213-9.
- [2] T. SICHLA and H. JACOBS, "ChemInform Abstract: Synthesis and Crystal Structure of Calcium Imide, CaNH.," *ChemInform*, 2010, doi: 10.1002/chin.199714007.
- [3] J. T. S. Irvine, D. C. Sinclair, and A. R. West, "Electroceramics: characterization by impedance spectroscopy," *Adv. Mater.*, vol. 2, no. 3, pp. 132–138, 1990, doi: 10.1002/adma.19900020304.
- [4] G. J. Irvine, M. Owen Jones, and J. T. Irvine, "Ionic conductivity dependence on composition and structure in calcium nitride hydride systems," *Submitt. Publ.*, no. submitted, 2022.
- [5] C. H. Shen, R. S. Liu, J. G. Lin, and C. Y. Huang, "Phase stability study of La<sub>1.2</sub>Ca<sub>1.8</sub>Mn<sub>2</sub>O<sub>7</sub>," *Mater. Res. Bull.*, vol. 36, pp. 1139–1148, 2001.
- [6] O. Reckweg and F. J. DiSalvo, "About binary and ternary alkaline earth metal nitrides," *Zeitschrift für Anorg. und Allg. Chemie*, vol. 627, no. 3, pp. 371–377, Mar. 2001, doi: 10.1002/1521-3749(200103)627:3<371::AID-ZAAC371>3.0.CO;2-A.
